# Supplementary material
Source: PubMed Central journal article supplement (PMC3234981)
Supplement: supp_M111.282046_jbc.M111.282046-1.pdf [file supp_M111.282046_jbc.M111.282046-1.pdf]

## Supplemental Table 1

Flux from glucose to glycolytic end-products: lactate, pyruvate and alanine.

Flux measurements were made by quantifying metabolites in culture medium after 24 h and measuring  $^{13}\text{C}$  labeling in comparison with labeling of input  $^{13}\text{C}$  glucose. Units are nmol/mg cell protein/h.

| Cell line   |          | Lactate | Pyruvate | Alanine |
|-------------|----------|---------|----------|---------|
| WM35        | normoxia | 1282    | 273      | 47      |
| WM35        | hypoxia  | 6256    | 86       | 83      |
| Me1501      | normoxia | 3423    | 163      | 44      |
| Me1501      | hypoxia  | 5695    | 202      | 54      |
| UACC903     | normoxia | 3519    | 145      | 58      |
| UACC903     | hypoxia  | 7437    | 14       | 59      |
| WM793       | normoxia | 5742    | 290      | 62      |
| WM793       | hypoxia  | 6274    | 358      | 71      |
| Lu1205      | normoxia | 4617    | 313      | 48      |
| Lu1205      | hypoxia  | 6386    | 70       | 61      |
| MeWo        | normoxia | 3688    | 205      | 58      |
| MeWo        | hypoxia  | 6816    | 125      | 81      |
| Melanocytes | normoxia | 404     | 60       | 5       |
| Melanocytes | hypoxia  | 2173    | 94       | 14      |
| H3A         | normoxia | 827     | 141      | 2       |
| H3A         | hypoxia  | 1536    | 56       | 5       |
